# Supplementary material for: Diversity of Plant Methionine Sulfoxide Reductases B and Evolution of a Form Specific for Free Methionine Sulfoxide
Source: PLOS journal article supplement (doi:10.1371/journal.pone.0065637), 2013-06-12
Supplement: S2 (10.1371/journal.pone.0065637.s002) [file journal.pone.0065637.s002]

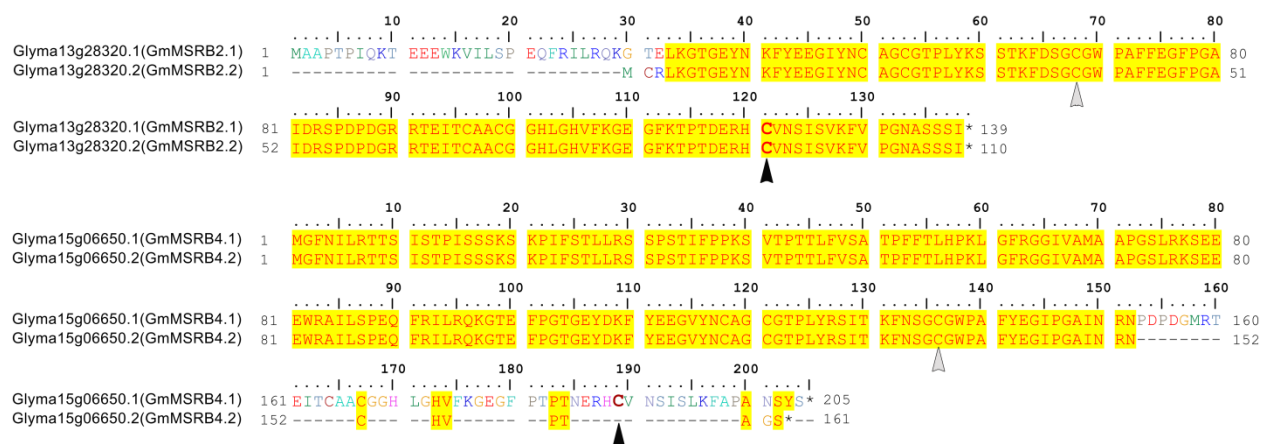

**Fig. S2.** Sequence alignments of proteins encoded by different alternate transcripts of GmMSRB2 (upper panel) and GmMSRB4 (lower panel). Black arrows indicate catalytic Cys, and gray arrows indicate resolving Cys.
